# Supplementary material
Source: bioRxiv or medRxiv preprint supplement (https://medrxiv.org/highwire/filestream/80525/field_highwire_adjunct_files/0/2020.04.24.20078584-1.pdf)
Supplement: Supplementary file [file 2020.04.24.20078584-1.pdf]

## I.2. Anexo 2 – Questionário Breve de percepção de doença

Nome: \_\_\_\_\_

Data: / /

### QUESTIONÁRIO DE PERCEPÇÃO DE DOENÇAS VERSÃO BREVE – (Brief IPQ)

Este questionário é sobre o que você pensa sobre a sua doença. Não existe resposta certa ou errada, o que importa é que você escolha a alternativa que melhor represente a maneira como você percebe a sua doença. Por exemplo:

Quanto você acha que é responsável pela sua saúde?

|                                      |   |   |   |   |   |   |   |   |                                             |    |
|--------------------------------------|---|---|---|---|---|---|---|---|---------------------------------------------|----|
| 0                                    | 1 | 2 | 3 | 4 | 5 | 6 | 7 | 8 | 9                                           | 10 |
| Não sou responsável pela minha saúde |   |   |   |   |   |   |   |   | Sou totalmente responsável pela minha saúde |    |

Para a questão acima, caso você pense que tem muita responsabilidade pela sua saúde, mas que não é totalmente responsável por ela, você poderia circular o número 8 ou o número 9, por exemplo. Se você acha que tem pouca responsabilidade pela sua saúde poderia circular o número 1 ou o número 2, e assim por diante.

Da mesma maneira, para as questões a seguir, por favor, circule o número que melhor corresponda ao seu ponto de vista.

1. Quanto a doença afeta a sua vida?

|                                |   |   |   |   |   |   |   |   |                               |    |
|--------------------------------|---|---|---|---|---|---|---|---|-------------------------------|----|
| 0                              | 1 | 2 | 3 | 4 | 5 | 6 | 7 | 8 | 9                             | 10 |
| Não afeta em nada a minha vida |   |   |   |   |   |   |   |   | Afeta gravemente a minha vida |    |

2. Quanto controle você sente que tem sobre a sua doença?

|                               |   |   |   |   |   |   |   |   |                        |    |
|-------------------------------|---|---|---|---|---|---|---|---|------------------------|----|
| 0                             | 1 | 2 | 3 | 4 | 5 | 6 | 7 | 8 | 9                      | 10 |
| Absolutamente nenhum controle |   |   |   |   |   |   |   |   | Tenho extremo controle |    |

3. Quanto você pensa que o tratamento pode ajudar a melhorar a sua doença?

|                     |   |   |   |   |   |   |   |   |                      |    |
|---------------------|---|---|---|---|---|---|---|---|----------------------|----|
| 0                   | 1 | 2 | 3 | 4 | 5 | 6 | 7 | 8 | 9                    | 10 |
| Não ajudará em nada |   |   |   |   |   |   |   |   | Ajudará extremamente |    |

4. Quanto você sente sintomas (sinais, reações ou manifestações) da sua doença?

|                          |   |   |   |   |   |   |   |   |                             |    |
|--------------------------|---|---|---|---|---|---|---|---|-----------------------------|----|
| 0                        | 1 | 2 | 3 | 4 | 5 | 6 | 7 | 8 | 9                           | 10 |
| Não sinto nenhum sintoma |   |   |   |   |   |   |   |   | Sinto muito sintomas graves |    |

5. Quanto você está preocupado(a) com sua doença?

|                         |   |   |   |   |   |   |   |   |                         |    |
|-------------------------|---|---|---|---|---|---|---|---|-------------------------|----|
| 0                       | 1 | 2 | 3 | 4 | 5 | 6 | 7 | 8 | 9                       | 10 |
| Nem um pouco preocupado |   |   |   |   |   |   |   |   | Nem um pouco preocupado |    |

6. Até que ponto você acha que compreende a sua doença?

|                     |   |   |   |   |   |   |   |   |                             |    |
|---------------------|---|---|---|---|---|---|---|---|-----------------------------|----|
| 0                   | 1 | 2 | 3 | 4 | 5 | 6 | 7 | 8 | 9                           | 10 |
| Não compreendo nada |   |   |   |   |   |   |   |   | Compreendo muito claramente |    |

7. Quanto a sua doença o(a) afeta emocionalmente? (Por exemplo, faz você sentir raiva, medo, ficar chateado ou depressivo).

|                                     |   |   |   |   |   |   |   |   |                                    |    |
|-------------------------------------|---|---|---|---|---|---|---|---|------------------------------------|----|
| 0                                   | 1 | 2 | 3 | 4 | 5 | 6 | 7 | 8 | 9                                  | 10 |
| Não me afeta emocionalmente em nada |   |   |   |   |   |   |   |   | Afeta-me muitíssimo emocionalmente |    |

8. Quanto tempo você pensa que sua doença irá durar? Explique.

\_\_\_\_\_

9. Por favor, liste os fatores mais importantes que você acredita que causaram a sua doença. As causas mais importantes pra mim são:

1ª

2ª

3ª

### I.3. Anexo 3 – Termo de Consentimento Questionário Breve de percepção de doença

#### TERMO DE CONSENTIMENTO LIVRE E ESCLARECIDO

Você está sendo convidado(a) a participar como voluntário(a) do estudo " **Estudo para avaliar a percepção de doença por pacientes internados com COVID-19 através de um Questionário Breve de percepção de doenças** ". Este documento, chamado Termo de Consentimento Livre e Esclarecido, visa assegurar seus direitos e deveres como participante. Você deve salvar ou imprimir uma cópia deste documento e guardá-lo com você caso ache necessário.

Após a leitura desse documento, preencha o formulário com seus dados e envie, assim estará automaticamente concordando em participar da pesquisa.

A pesquisa que tem como objetivo fornecer aos serviços de saúde o seu entendimento da infecção pelo coronavírus, e sua percepção da gravidade da doença com avaliação do resultado do seu tratamento.

Por essa razão, o(a) senhor(a) está sendo convidado(a) a participar da pesquisa. Sua participação consistirá em:

1. Participar de um questionário de 14 questões a ser enviado por link específico em seu email ou mensagem de WhatsApp.
2. O(a) Sr.(a) será contactado (a) através do email que disponibilizar no cadastro.
3. Os questionários serão abertos no ambiente virtual específico a cada 15 dias, em média, durante o período máximo de 02 meses.

TCLE de modo virtual (e-mails)

"A aplicação do TCLE deve ser feita preferencialmente de maneira direta e resultando em documento assinado em papel. Devido a circunstância especial de se evitar entrevistas pessoais por conta da pandemia, é justificável aplicar o TCLE de modo virtual que não resultem em assinatura formal. Sendo que o Aceite se dá pelo preenchimento no corpo do questionário do aceite no documento enviado".

Aceito       Não aceito

SIGILO E PRIVACIDADE:

Todas as informações que o(a) Sr.(a) nos fornecer serão utilizadas somente para esta pesquisa. Os dados pessoais que fornecerá serão utilizados somente para a construção dos painéis de especialistas. Sua identidade será codificada e somente a pesquisadora e um dos membros da equipe terá acesso a esta chave de identificação.

Suas respostas e dados pessoais serão guardados na confidencialidade, seu nome não aparecerá durante a pesquisa, nem quando os resultados forem apresentados, e seus dados de contato não serão repassados a outrem.

DESCONFORTO E RISCOS:

Responder ao questionário não está associado a riscos de saúde diretos. A participação nesta pesquisa é voluntária. Caso o(a) Sr.(a) aceite participar, não receberá nenhuma compensação financeira. Também não sofrerá qualquer prejuízo se não aceitar ou se desistir após ter iniciado a pesquisa.

BENEFÍCIOS:

Este estudo não apresenta benefícios diretos aos participantes. Porém, seus resultados poderão ser benéficos para nortear políticas de Saúde Mental para a classe médica.

CONTATO:

Se tiver alguma dúvida a respeito dos objetivos da pesquisa e/ou dos métodos utilizados na mesma, pode procurar por Dr. Daniel Kanda Abe, [abe.daniel@hotmail.com](mailto:abe.daniel@hotmail.com).

Por favor, baixe uma cópia do Termo de Consentimento Livre e Esclarecido neste [link](#). É fundamental que você mantenha sua cópia do termo. Se preferir, você também pode solicitar uma cópia física assinada pelo pesquisador responsável por meio de seus contatos informados acima.

Dr. Daniel Kanda Abe  
CRM SP 133690  
Doutor em Urologia pela FMUSP

## I.4. Anexo 4 – Questionário de escala de estresse percebido e questionário específico para profissionais de saúde.

### Escala de Estresse Percebido PSS -14

| Neste último mês, com que frequência... |                                                                                                     |   |   |   |   |   |
|-----------------------------------------|-----------------------------------------------------------------------------------------------------|---|---|---|---|---|
| 1                                       | Você tem ficado triste por causa de algo que aconteceu inesperadamente?                             | 0 | 1 | 2 | 3 | 4 |
| 2                                       | Você tem se sentido incapaz de controlar as coisas importantes em sua vida?                         | 0 | 1 | 2 | 3 | 4 |
| 3                                       | Você tem se sentido nervoso e "estressado"?                                                         | 0 | 1 | 2 | 3 | 4 |
| 4                                       | Você tem tratado com sucesso dos problemas difíceis da vida?                                        | 0 | 1 | 2 | 3 | 4 |
| 5                                       | Você tem sentido que está lidando bem as mudanças importantes que estão ocorrendo em sua vida?      | 0 | 1 | 2 | 3 | 4 |
| 6                                       | Você tem se sentido confiante na sua habilidade de resolver problemas pessoais?                     | 0 | 1 | 2 | 3 | 4 |
| 7                                       | Você tem sentido que as coisas estão acontecendo de acordo com a sua vontade?                       | 0 | 1 | 2 | 3 | 4 |
| 8                                       | Você tem achado que não conseguiria lidar com todas as coisas que você tem que fazer?               | 0 | 1 | 2 | 3 | 4 |
| 9                                       | Você tem conseguido controlar as irritações em sua vida?                                            | 0 | 1 | 2 | 3 | 4 |
| 10                                      | Você tem sentido que as coisas estão sob o seu controle?                                            | 0 | 1 | 2 | 3 | 4 |
| 11                                      | Você tem ficado irritado porque as coisas que acontecem estão fora do seu controle?                 | 0 | 1 | 2 | 3 | 4 |
| 12                                      | Você tem se encontrado pensando sobre as coisas que deve fazer?                                     | 0 | 1 | 2 | 3 | 4 |
| 13                                      | Você tem conseguido controlar a maneira como gasta seu tempo?                                       | 0 | 1 | 2 | 3 | 4 |
| 14                                      | Você tem sentido que as dificuldades se acumulam a ponto de você acreditar que não pode superá-las? | 0 | 1 | 2 | 3 | 4 |

### D.4.2- Questionário específico para COVID-1

1- Você esta atendendo na linha de frente (Pronto Socorro) ou unidades de internação de pacientes com COVID-19 ou em outras unidades?

- ( ) Pronto Socorro Covid-19 ou Unidades de internação Covid -19  
 ( ) Ambulatório ou unidade de internação não COVID ou Áreas Administrativas  
 ( ) Não estou atendendo (Grupo de risco)  
 ( ) Não estou atendendo (Atestado )

2 – Se for grupo de risco, assinale as características?

- ( ) 1 fator de risco  
 ( ) 2 fatores de risco  
 ( ) 3 ou mais fatores de risco

3- Você acredita que se adquirir a doença irá:

- ( ) Ter sintomas leves  
 ( ) Ter sintomas graves ( doença pulmonar com necessidade de internação ou Tromboembolismo)  
 ( ) Poderá ir à obito  
 ( ) Ser assintomático

4 – O seu principal temor em relação a se infectar ( pode ser assinalado mais de um item)

- ( ) Ter a doença  
 ( ) Transmitir para seu conjugue e filhos  
 ( ) Transmitir para seus pais  
 ( ) Não tem preocupação em adquirir a doença

5- Você acredita que seus colegas

- ( ) Estão bem informados e tranquilos em relação a doença  
 ( ) Estão mal informados e ansiosos com relação a doença

## I.5. Anexo 5 – Termo de consentimento escala de estresse percebido

### TERMO DE CONSENTIMENTO LIVRE E ESCLARECIDO

Você está sendo convidado(a) a participar como voluntário(a) do estudo " **Estudo para avaliação do estresse apresentado por profissionais de saúde envolvidos no atendimento de pacientes com COVID-19 através da Escala de Estresse Percebido.**" Este documento, chamado Termo de Consentimento Livre e Esclarecido, visa assegurar seus direitos e deveres como participante. Você deve salvar ou imprimir uma cópia deste documento e guardá-lo com você caso ache necessário.

Após a leitura desse documento, preencha o formulário com seus dados e envie, assim estará automaticamente concordando em participar da pesquisa.

A pesquisa que tem como objetivo fornecer aos serviços de saúde o quadro de saúde mental e bem estar de seus profissionais médicos nesse momento de pandemia.

Por essa razão, o(a) senhor(a) está sendo convidado(a) a participar da pesquisa. Sua participação consistirá em:

1. Participar de um questionário de 14 questões PSS e questionário sobre COVID -19 de 5 questões, a ser enviado por link específico em seu email ou mensagem de WhatsApp.
2. O(a) Sr.(a)será contactado (a) através do email que disponibilizar no cadastro.
3. Os questionários serão abertos no ambiente virtual específico a cada 15 dias, em média, durante o período máximo de 02 meses.

TCLE de modo virtual (e-mails)

"A aplicação do TCLE deve ser feita preferencialmente de maneira direta e resultando em documento assinado em papel. Devido a circunstância especial de se evitar entrevistas pessoais por conta da pandemia, é justificável aplicar o TCLE de modo virtual que não resultem em assinatura formal. Sendo que o Aceite se dará pelo preenchimento no corpo do questionário do aceite no documento enviado.

Aceito       Não aceito

SIGILO E PRIVACIDADE:

Todas as informações que o(a) Sr.(a) nos fornecer serão utilizadas somente para esta pesquisa. Os dados pessoais que fornecerá serão utilizados somente para a construção dos painéis de especialistas. Sua identidade será codificada e somente a pesquisadora e um dos membros da equipe terá acesso a esta chave de identificação.

Suas respostas e dados pessoais serão guardados na confidencialidade, seu nome não aparecerá durante a pesquisa, nem quando os resultados forem apresentados, e seus dados de contato não serão repassados a outrem.

DESCONFORTO E RISCOS:

Responder ao questionário não está associado a riscos de saúde diretos. A participação nesta pesquisa é voluntária. Caso o(a) Sr.(a) aceite participar, não receberá nenhuma compensação financeira. Também não sofrerá qualquer prejuízo se não aceitar ou se desistir após ter iniciado a pesquisa.

BENEFÍCIOS:

Este estudo não apresenta benefícios diretos aos participantes. Porém, seus resultados poderão ser benéficos para nortear políticas de Saúde Mental para a classe médica.

CONTATO:

Se tiver alguma dúvida a respeito dos objetivos da pesquisa e/ou dos métodos utilizados na mesma, pode procurar por Dr. Daniel Kanda Abe, [abe.daniel@hotmail.com](mailto:abe.daniel@hotmail.com).

Por favor, baixe uma cópia do Termo de Consentimento Livre e Esclarecido neste [link](#). É fundamental que você mantenha sua cópia do termo. Se preferir, você também pode solicitar uma cópia física assinada pelo pesquisador responsável por meio de seus contatos informados acima.

Dr. Daniel Kanda Abe  
CRM SP 133690  
Doutor em Urologia pela FMUSP
